# Supplementary material
Source: publisher figshare collection journal article supplement (https://acs.figshare.com/ndownloader/files/3893368)
Supplement: Supplementary file 1 [file 3893368]

data_ch14725
 
_audit_creation_method            SHELXL-97
_chemical_name_systematic
;
 ?
;
_chemical_name_common             ?
_chemical_melting_point           ?
_chemical_formula_moiety          'C42.50 H43 Cl N2 O4 S2''
_chemical_formula_sum             'C42.50 H43 Cl N2 O4 S2'
_chemical_formula_weight          745.36
 
loop_
 _atom_type_symbol
 _atom_type_description
 _atom_type_scat_dispersion_real
 _atom_type_scat_dispersion_imag
 _atom_type_scat_source
 'C'  'C'   0.0033   0.0016
 'International Tables Vol C Tables 4.2.6.8 and 6.1.1.4'
 'H'  'H'   0.0000   0.0000
 'International Tables Vol C Tables 4.2.6.8 and 6.1.1.4'
 'N'  'N'   0.0061   0.0033
 'International Tables Vol C Tables 4.2.6.8 and 6.1.1.4'
 'O'  'O'   0.0106   0.0060
 'International Tables Vol C Tables 4.2.6.8 and 6.1.1.4'
 'S'  'S'   0.1246   0.1234
 'International Tables Vol C Tables 4.2.6.8 and 6.1.1.4'
 'Cl'  'Cl'   0.1484   0.1585
 'International Tables Vol C Tables 4.2.6.8 and 6.1.1.4'
 
_symmetry_cell_setting            monoclinic
_symmetry_space_group_name_H-M    'P 21'
 
loop_
 _symmetry_equiv_pos_as_xyz
 'x, y, z'
 '-x, y+1/2, -z'
 
_cell_length_a                    9.6551(6)
_cell_length_b                    18.2180(10)
_cell_length_c                    12.0682(6)
_cell_angle_alpha                 90.00
_cell_angle_beta                  105.377(3)
_cell_angle_gamma                 90.00
_cell_volume                      2046.8(2)
_cell_formula_units_Z             2
_cell_measurement_temperature     296(2)
_cell_measurement_reflns_used     0
_cell_measurement_theta_min       0
_cell_measurement_theta_max       0
 
_exptl_crystal_description        prism
_exptl_crystal_colour             colorless
_exptl_crystal_size_max           0.28
_exptl_crystal_size_mid           0.21
_exptl_crystal_size_min           0.12
_exptl_crystal_density_meas       ?
_exptl_crystal_density_diffrn     1.209
_exptl_crystal_density_method     'not measured'
_exptl_crystal_F_000              786
_exptl_absorpt_coefficient_mu     0.237
_exptl_absorpt_correction_type    multi-scan
_exptl_absorpt_correction_T_min   0.9366
_exptl_absorpt_correction_T_max   0.9721
_exptl_absorpt_process_details    ?
 
_exptl_special_details
;
 ?
;
 
_diffrn_ambient_temperature       296(2)
_diffrn_radiation_wavelength      0.71073
_diffrn_radiation_type            MoK\a
_diffrn_radiation_source          'fine-focus sealed tube'
_diffrn_radiation_monochromator   graphite
_diffrn_measurement_device_type   ?
_diffrn_measurement_method        ?
_diffrn_detector_area_resol_mean  ?
_diffrn_standards_number          ?
_diffrn_standards_interval_count  ?
_diffrn_standards_interval_time   ?
_diffrn_standards_decay_%         ?
_diffrn_reflns_number             12645
_diffrn_reflns_av_R_equivalents   0.0606
_diffrn_reflns_av_sigmaI/netI     0.1326
_diffrn_reflns_limit_h_min        -11
_diffrn_reflns_limit_h_max        11
_diffrn_reflns_limit_k_min        -20
_diffrn_reflns_limit_k_max        21
_diffrn_reflns_limit_l_min        -14
_diffrn_reflns_limit_l_max        12
_diffrn_reflns_theta_min          2.08
_diffrn_reflns_theta_max          25.13
_reflns_number_total              6788
_reflns_number_gt                 3477
_reflns_threshold_expression      >2sigma(I)
 
_computing_data_collection        ?
_computing_cell_refinement        ?
_computing_data_reduction         ?
_computing_structure_solution     'SHELXS-86 (Sheldrick, 1986)'
_computing_structure_refinement   'SHELXL-97 (Sheldrick, 1997)'
_computing_molecular_graphics     'Ortep-3 for Windows (Farrugia, 1997)'
_computing_publication_material   'WinGX publication routines (Farrugia, 1999)'
 
_refine_special_details
;
 Refinement of F^2^ against ALL reflections.  The weighted R-factor wR and
 goodness of fit S are based on F^2^, conventional R-factors R are based
 on F, with F set to zero for negative F^2^. The threshold expression of
 F^2^ > 2sigma(F^2^) is used only for calculating R-factors(gt) etc. and is
 not relevant to the choice of reflections for refinement.  R-factors based
 on F^2^ are statistically about twice as large as those based on F, and R-
 factors based on ALL data will be even larger.
;
 
_refine_ls_structure_factor_coef  Fsqd
_refine_ls_matrix_type            full
_refine_ls_weighting_scheme       calc
_refine_ls_weighting_details
 'calc w=1/[\s^2^(Fo^2^)+(0.1741P)^2^+0.0000P] where P=(Fo^2^+2Fc^2^)/3'
_atom_sites_solution_primary      direct
_atom_sites_solution_secondary    difmap
_atom_sites_solution_hydrogens    geom
_refine_ls_hydrogen_treatment     constr
_refine_ls_extinction_method      none
_refine_ls_extinction_coef        ?
_refine_ls_abs_structure_details
 'Flack H D (1983), Acta Cryst. A39, 876-881'
_refine_ls_abs_structure_Flack    0.2(2)
_refine_ls_number_reflns          6788
_refine_ls_number_parameters      471
_refine_ls_number_restraints      3
_refine_ls_R_factor_all           0.1719
_refine_ls_R_factor_gt            0.0919
_refine_ls_wR_factor_ref          0.3111
_refine_ls_wR_factor_gt           0.2472
_refine_ls_goodness_of_fit_ref    1.006
_refine_ls_restrained_S_all       1.005
_refine_ls_shift/su_max           0.030
_refine_ls_shift/su_mean          0.006
 
loop_
 _atom_site_label
 _atom_site_type_symbol
 _atom_site_fract_x
 _atom_site_fract_y
 _atom_site_fract_z
 _atom_site_U_iso_or_equiv
 _atom_site_adp_type
 _atom_site_occupancy
 _atom_site_symmetry_multiplicity
 _atom_site_calc_flag
 _atom_site_refinement_flags
 _atom_site_disorder_assembly
 _atom_site_disorder_group
C1 C 0.2322(9) 0.0564(15) 0.7450(8) 0.053(2) Uani 1 1 d . . .
C2 C 0.3551(11) 0.0150(15) 0.7518(9) 0.071(3) Uani 1 1 d . . .
H2 H 0.4441 0.0322 0.7941 0.085 Uiso 1 1 calc R . .
C3 C 0.3452(13) -0.0502(16) 0.6970(11) 0.085(4) Uani 1 1 d . . .
H3 H 0.4272 -0.0780 0.7014 0.102 Uiso 1 1 calc R . .
C4 C 0.2048(16) -0.0766(16) 0.6306(11) 0.086(4) Uani 1 1 d . . .
C5 C 0.2062(17) -0.1472(16) 0.5605(13) 0.120(6) Uani 1 1 d . . .
H5A H 0.3024 -0.1660 0.5768 0.179 Uiso 1 1 calc R . .
H5B H 0.1722 -0.1364 0.4800 0.179 Uiso 1 1 calc R . .
H5C H 0.1448 -0.1833 0.5810 0.179 Uiso 1 1 calc R . .
C6 C 0.0913(12) -0.0363(15) 0.6270(10) 0.073(3) Uani 1 1 d . . .
H6 H 0.0016 -0.0524 0.5845 0.088 Uiso 1 1 calc R . .
C7 C 0.1020(11) 0.0298(15) 0.6852(8) 0.063(3) Uani 1 1 d . . .
H7 H 0.0192 0.0564 0.6835 0.075 Uiso 1 1 calc R . .
C8 C 0.1831(12) 0.2186(15) 0.6021(7) 0.070(3) Uani 1 1 d . . .
H8 H 0.0923 0.2252 0.6227 0.084 Uiso 1 1 calc R . .
C9 C 0.1506(11) 0.1597(15) 0.5066(7) 0.058(3) Uani 1 1 d D . .
C10 C 0.2556(12) 0.1147(15) 0.4874(8) 0.069(3) Uani 1 1 d D . .
H10 H 0.3500 0.1187 0.5318 0.083 Uiso 1 1 calc R . .
C11 C 0.2173(14) 0.0625(15) 0.3994(9) 0.084(4) Uani 1 1 d D . .
H11 H 0.2891 0.0321 0.3867 0.101 Uiso 1 1 calc R . .
C12 C 0.0838(18) 0.0537(16) 0.3323(11) 0.101(4) Uani 1 1 d D . .
H12 H 0.0616 0.0185 0.2745 0.121 Uiso 1 1 calc R . .
C13 C -0.0181(17) 0.0995(16) 0.3538(10) 0.106(5) Uani 1 1 d D . .
H13 H -0.1121 0.0948 0.3087 0.127 Uiso 1 1 calc R . .
C14 C 0.0101(11) 0.1515(15) 0.4373(8) 0.073(3) Uani 1 1 d D . .
H14 H -0.0632 0.1813 0.4484 0.088 Uiso 1 1 calc R . .
C15 C 0.2198(10) 0.2942(15) 0.5660(8) 0.056(3) Uani 1 1 d . . .
C16 C 0.2706(14) 0.3034(16) 0.4657(11) 0.090(4) Uani 1 1 d . . .
H16 H 0.2788 0.2630 0.4207 0.107 Uiso 1 1 calc R . .
C17 C 0.3076(15) 0.3732(16) 0.4361(13) 0.098(5) Uani 1 1 d . . .
H17 H 0.3372 0.3801 0.3695 0.118 Uiso 1 1 calc R . .
C18 C 0.3000(11) 0.4323(16) 0.5063(10) 0.076(3) Uani 1 1 d . . .
C19 C 0.3427(14) 0.5078(16) 0.4710(12) 0.105(5) Uani 1 1 d . . .
H19A H 0.3748 0.5031 0.4025 0.158 Uiso 1 1 calc R . .
H19B H 0.4188 0.5276 0.5317 0.158 Uiso 1 1 calc R . .
H19C H 0.2613 0.5401 0.4565 0.158 Uiso 1 1 calc R . .
C20 C 0.2468(12) 0.4230(16) 0.5988(10) 0.073(3) Uani 1 1 d . . .
H20 H 0.2368 0.4634 0.6432 0.087 Uiso 1 1 calc R . .
C21 C 0.2083(11) 0.3559(16) 0.6272(8) 0.064(3) Uani 1 1 d . . .
H21 H 0.1725 0.3514 0.6912 0.077 Uiso 1 1 calc R . .
C22 C 0.2578(10) 0.7937(15) 0.2450(7) 0.052(2) Uani 1 1 d . . .
C23 C 0.3812(12) 0.8357(16) 0.2555(10) 0.080(3) Uani 1 1 d . . .
H23 H 0.4711 0.8204 0.2990 0.096 Uiso 1 1 calc R . .
C24 C 0.3608(14) 0.9034(16) 0.1955(13) 0.092(4) Uani 1 1 d . . .
H24 H 0.4407 0.9327 0.1988 0.110 Uiso 1 1 calc R . .
C25 C 0.2258(14) 0.9286(16) 0.1315(10) 0.075(3) Uani 1 1 d . . .
C26 C 0.2101(16) 0.9988(17) 0.0625(13) 0.126(6) Uani 1 1 d . . .
H26A H 0.3026 1.0213 0.0732 0.189 Uiso 1 1 calc R . .
H26B H 0.1473 1.0318 0.0878 0.189 Uiso 1 1 calc R . .
H26C H 0.1703 0.9878 -0.0175 0.189 Uiso 1 1 calc R . .
C27 C 0.1101(12) 0.8862(16) 0.1296(10) 0.077(3) Uani 1 1 d . . .
H27 H 0.0190 0.9024 0.0902 0.092 Uiso 1 1 calc R . .
C28 C 0.1243(11) 0.8204(16) 0.1842(10) 0.075(3) Uani 1 1 d . . .
H28 H 0.0427 0.7924 0.1809 0.090 Uiso 1 1 calc R . .
C29 C 0.2640(9) 0.6395(15) 0.1077(6) 0.051(2) Uani 1 1 d . . .
H29 H 0.3650 0.6540 0.1359 0.062 Uiso 1 1 calc R . .
C30 C 0.1939(11) 0.6891(15) 0.0058(8) 0.065(3) Uani 1 1 d . . .
C31 C 0.2759(13) 0.7430(16) -0.0291(11) 0.082(4) Uani 1 1 d . . .
H31 H 0.3731 0.7471 0.0080 0.098 Uiso 1 1 calc R . .
C32 C 0.214(2) 0.7910(17) -0.1194(13) 0.107(5) Uani 1 1 d . . .
H32 H 0.2688 0.8259 -0.1448 0.128 Uiso 1 1 calc R . .
C33 C 0.0720(19) 0.7848(17) -0.1677(11) 0.099(5) Uani 1 1 d . . .
H33 H 0.0296 0.8184 -0.2246 0.119 Uiso 1 1 calc R . .
C34 C -0.0140(15) 0.7330(16) -0.1395(10) 0.094(4) Uani 1 1 d . . .
H34 H -0.1110 0.7305 -0.1781 0.112 Uiso 1 1 calc R . .
C35 C 0.0475(13) 0.6827(15) -0.0497(9) 0.080(3) Uani 1 1 d . . .
H35 H -0.0083 0.6465 -0.0285 0.096 Uiso 1 1 calc R . .
C36 C 0.2597(8) 0.5588(15) 0.0718(7) 0.050(2) Uani 1 1 d . . .
C37 C 0.2221(13) 0.5036(16) 0.1330(10) 0.075(3) Uani 1 1 d . . .
H37 H 0.1894 0.5144 0.1971 0.090 Uiso 1 1 calc R . .
C38 C 0.2321(14) 0.4290(16) 0.1000(11) 0.087(4) Uani 1 1 d . . .
H38 H 0.2065 0.3918 0.1435 0.104 Uiso 1 1 calc R . .
C39 C 0.2767(12) 0.4114(16) 0.0097(10) 0.075(3) Uani 1 1 d . . .
C40 C 0.2871(16) 0.3297(16) -0.0275(13) 0.116(5) Uani 1 1 d . . .
H40A H 0.2567 0.2978 0.0248 0.174 Uiso 1 1 calc R . .
H40B H 0.3846 0.3186 -0.0264 0.174 Uiso 1 1 calc R . .
H40C H 0.2263 0.3226 -0.1038 0.174 Uiso 1 1 calc R . .
C41 C 0.3131(14) 0.4678(17) -0.0510(11) 0.089(4) Uani 1 1 d . . .
H41 H 0.3434 0.4570 -0.1162 0.107 Uiso 1 1 calc R . .
C42 C 0.3070(13) 0.5395(16) -0.0200(10) 0.080(3) Uani 1 1 d . . .
H42 H 0.3360 0.5759 -0.0630 0.096 Uiso 1 1 calc R . .
C43 C 0.5443 0.1815 0.3217 0.114(9) Uiso 0.50 1 d P . .
H43A H 0.5101 0.1735 0.3894 0.137 Uiso 0.50 1 calc PR . .
H43B H 0.6448 0.1951 0.3486 0.137 Uiso 0.50 1 calc PR . .
N1 N 0.2825(8) 0.1993(15) 0.7049(6) 0.067(2) Uani 1 1 d . . .
H1 H 0.3674 0.2176 0.7175 0.080 Uiso 1 1 calc R . .
N2 N 0.1952(7) 0.6491(15) 0.2032(5) 0.0513(18) Uani 1 1 d . . .
H2A H 0.1181 0.6259 0.2043 0.062 Uiso 1 1 calc R . .
O1 O 0.1198(7) 0.1642(15) 0.8250(6) 0.084(2) Uani 1 1 d . . .
O2 O 0.3790(6) 0.1476(14) 0.8951(5) 0.0675(18) Uani 1 1 d . . .
O3 O 0.4241(6) 0.6884(15) 0.3464(5) 0.0651(18) Uani 1 1 d . . .
O4 O 0.1858(7) 0.7027(15) 0.3861(5) 0.076(2) Uani 1 1 d . . .
S1 S 0.2507(2) 0.1445(14) 0.80409(18) 0.0543(7) Uani 1 1 d . . .
S2 S 0.2723(2) 0.7058(14) 0.30626(19) 0.0563(7) Uani 1 1 d . . .
Cl1 Cl 0.4606(7) 0.2505(14) 0.2561(6) 0.0924(19) Uani 0.50 1 d P . .
Cl2 Cl 0.5366(8) 0.0991(14) 0.2527(5) 0.097(2) Uani 0.50 1 d P . .
 
loop_
 _atom_site_aniso_label
 _atom_site_aniso_U_11
 _atom_site_aniso_U_22
 _atom_site_aniso_U_33
 _atom_site_aniso_U_23
 _atom_site_aniso_U_13
 _atom_site_aniso_U_12
C1 0.040(5) 0.056(7) 0.065(6) 0.001(5) 0.019(4) -0.008(5)
C2 0.053(6) 0.060(8) 0.089(7) -0.012(6) 0.002(5) -0.006(6)
C3 0.063(7) 0.078(11) 0.103(9) 0.000(8) 0.004(6) 0.009(7)
C4 0.104(10) 0.065(10) 0.089(9) -0.005(7) 0.024(8) -0.025(8)
C5 0.143(13) 0.041(9) 0.156(13) -0.042(9) 0.008(10) -0.019(8)
C6 0.058(7) 0.062(9) 0.093(8) 0.006(7) 0.009(6) -0.012(6)
C7 0.057(6) 0.058(8) 0.075(7) -0.004(6) 0.022(5) -0.007(5)
C8 0.083(7) 0.076(8) 0.051(5) 0.003(5) 0.018(5) -0.003(6)
C9 0.078(7) 0.050(7) 0.048(5) 0.006(5) 0.023(5) 0.002(6)
C10 0.068(7) 0.072(9) 0.074(6) -0.001(6) 0.033(5) -0.003(6)
C11 0.084(8) 0.092(11) 0.080(7) -0.043(7) 0.029(7) 0.006(7)
C12 0.127(12) 0.100(12) 0.087(8) -0.020(8) 0.047(9) -0.004(10)
C13 0.114(11) 0.127(14) 0.062(7) 0.003(8) -0.004(7) -0.037(10)
C14 0.077(7) 0.075(8) 0.072(6) -0.010(7) 0.026(5) -0.003(7)
C15 0.051(5) 0.058(7) 0.065(6) -0.003(5) 0.025(5) -0.001(5)
C16 0.124(10) 0.075(10) 0.084(8) -0.015(7) 0.054(8) -0.016(8)
C17 0.141(12) 0.056(9) 0.129(11) -0.016(8) 0.091(10) -0.017(8)
C18 0.072(7) 0.063(9) 0.086(8) 0.022(7) 0.011(6) -0.018(6)
C19 0.092(9) 0.079(10) 0.127(10) 0.044(8) -0.002(8) -0.015(8)
C20 0.080(8) 0.056(9) 0.074(7) -0.014(7) 0.005(6) -0.001(7)
C21 0.068(7) 0.074(10) 0.052(6) -0.005(6) 0.017(5) 0.003(6)
C22 0.051(6) 0.052(7) 0.052(5) -0.003(5) 0.013(4) -0.007(5)
C23 0.059(7) 0.068(9) 0.109(9) 0.017(7) 0.014(6) -0.008(6)
C24 0.077(8) 0.064(10) 0.142(11) 0.017(9) 0.041(8) -0.016(7)
C25 0.092(9) 0.064(9) 0.066(7) 0.010(6) 0.018(6) -0.006(7)
C26 0.121(12) 0.113(16) 0.138(12) 0.042(11) 0.022(10) -0.007(11)
C27 0.065(7) 0.073(10) 0.085(8) 0.008(7) 0.006(6) 0.002(7)
C28 0.063(7) 0.067(9) 0.090(8) 0.000(7) 0.014(6) -0.010(6)
C29 0.046(5) 0.060(6) 0.048(4) -0.001(5) 0.013(4) 0.003(5)
C30 0.064(6) 0.066(8) 0.073(6) 0.003(5) 0.034(5) 0.006(6)
C31 0.065(7) 0.083(9) 0.105(9) 0.009(7) 0.038(7) -0.003(7)
C32 0.130(13) 0.101(13) 0.100(10) 0.032(9) 0.046(9) 0.016(11)
C33 0.144(13) 0.084(11) 0.081(8) 0.045(7) 0.049(9) 0.049(10)
C34 0.099(9) 0.110(12) 0.064(7) 0.006(7) 0.007(6) -0.003(8)
C35 0.087(8) 0.081(9) 0.069(6) -0.013(6) 0.014(6) -0.003(7)
C36 0.034(4) 0.062(7) 0.051(5) -0.007(5) 0.006(4) 0.001(5)
C37 0.103(9) 0.049(8) 0.082(8) -0.012(6) 0.042(7) 0.000(6)
C38 0.117(11) 0.063(10) 0.087(8) -0.012(7) 0.039(8) -0.005(8)
C39 0.079(8) 0.068(9) 0.065(7) -0.010(6) -0.002(6) 0.015(7)
C40 0.133(12) 0.078(11) 0.124(11) -0.024(9) 0.013(9) 0.028(9)
C41 0.108(10) 0.087(11) 0.079(8) -0.023(8) 0.039(7) -0.005(8)
C42 0.106(9) 0.058(8) 0.093(8) -0.006(7) 0.056(7) 0.004(7)
N1 0.055(5) 0.067(6) 0.072(5) -0.005(4) 0.005(4) -0.017(5)
N2 0.048(4) 0.050(5) 0.062(4) -0.018(4) 0.025(3) -0.004(4)
O1 0.063(4) 0.093(6) 0.107(5) -0.007(5) 0.042(4) 0.016(4)
O2 0.050(3) 0.085(5) 0.062(3) -0.020(4) 0.004(3) -0.004(4)
O3 0.041(3) 0.071(5) 0.078(4) 0.004(3) 0.006(3) 0.009(3)
O4 0.086(5) 0.082(5) 0.075(4) -0.012(4) 0.047(4) -0.015(5)
S1 0.0498(13) 0.0610(18) 0.0519(11) -0.0011(13) 0.0129(10) 0.0001(13)
S2 0.0594(14) 0.0562(18) 0.0566(12) 0.0014(13) 0.0214(10) -0.0015(13)
Cl1 0.089(4) 0.080(5) 0.112(5) 0.003(4) 0.033(4) 0.018(4)
Cl2 0.122(5) 0.086(5) 0.101(4) -0.004(4) 0.058(4) 0.017(4)
 
_geom_special_details
;
 All esds (except the esd in the dihedral angle between two l.s. planes)
 are estimated using the full covariance matrix.  The cell esds are taken
 into account individually in the estimation of esds in distances, angles
 and torsion angles; correlations between esds in cell parameters are only
 used when they are defined by crystal symmetry.  An approximate (isotropic)
 treatment of cell esds is used for estimating esds involving l.s. planes.
;
 
loop_
 _geom_bond_atom_site_label_1
 _geom_bond_atom_site_label_2
 _geom_bond_distance
 _geom_bond_site_symmetry_2
 _geom_bond_publ_flag
C1 C7 1.362(12) . ?
C1 C2 1.390(14) . ?
C1 S1 1.747(11) . ?
C2 C3 1.350(16) . ?
C2 H2 0.9300 . ?
C3 C4 1.462(17) . ?
C3 H3 0.9300 . ?
C4 C6 1.310(17) . ?
C4 C5 1.542(18) . ?
C5 H5A 0.9600 . ?
C5 H5B 0.9600 . ?
C5 H5C 0.9600 . ?
C6 C7 1.384(15) . ?
C6 H6 0.9300 . ?
C7 H7 0.9300 . ?
C8 N1 1.397(11) . ?
C8 C15 1.514(16) . ?
C8 C9 1.544(14) . ?
C8 H8 0.9800 . ?
C9 C10 1.370(13) . ?
C9 C14 1.401(13) . ?
C10 C11 1.401(15) . ?
C10 H10 0.9300 . ?
C11 C12 1.338(17) . ?
C11 H11 0.9300 . ?
C12 C13 1.37(2) . ?
C12 H12 0.9300 . ?
C13 C14 1.355(17) . ?
C13 H13 0.9300 . ?
C14 H14 0.9300 . ?
C15 C21 1.364(15) . ?
C15 C16 1.431(14) . ?
C16 C17 1.394(19) . ?
C16 H16 0.9300 . ?
C17 C18 1.384(17) . ?
C17 H17 0.9300 . ?
C18 C20 1.357(16) . ?
C18 C19 1.529(17) . ?
C19 H19A 0.9600 . ?
C19 H19B 0.9600 . ?
C19 H19C 0.9600 . ?
C20 C21 1.349(17) . ?
C20 H20 0.9300 . ?
C21 H21 0.9300 . ?
C22 C28 1.390(13) . ?
C22 C23 1.394(14) . ?
C22 S2 1.754(11) . ?
C23 C24 1.417(17) . ?
C23 H23 0.9300 . ?
C24 C25 1.404(16) . ?
C24 H24 0.9300 . ?
C25 C27 1.354(16) . ?
C25 C26 1.511(19) . ?
C26 H26A 0.9600 . ?
C26 H26B 0.9600 . ?
C26 H26C 0.9600 . ?
C27 C28 1.357(16) . ?
C27 H27 0.9300 . ?
C28 H28 0.9300 . ?
C29 N2 1.486(10) . ?
C29 C30 1.531(13) . ?
C29 C36 1.530(15) . ?
C29 H29 0.9800 . ?
C30 C35 1.400(14) . ?
C30 C31 1.394(15) . ?
C31 C32 1.402(18) . ?
C31 H31 0.9300 . ?
C32 C33 1.344(19) . ?
C32 H32 0.9300 . ?
C33 C34 1.357(19) . ?
C33 H33 0.9300 . ?
C34 C35 1.423(16) . ?
C34 H34 0.9300 . ?
C35 H35 0.9300 . ?
C36 C42 1.352(13) . ?
C36 C37 1.354(15) . ?
C37 C38 1.428(17) . ?
C37 H37 0.9300 . ?
C38 C39 1.312(15) . ?
C38 H38 0.9300 . ?
C39 C41 1.360(19) . ?
C39 C40 1.566(18) . ?
C40 H40A 0.9600 . ?
C40 H40B 0.9600 . ?
C40 H40C 0.9600 . ?
C41 C42 1.364(19) . ?
C41 H41 0.9300 . ?
C42 H42 0.9300 . ?
C43 Cl1 1.59(2) . ?
C43 Cl2 1.71(2) . ?
C43 H43A 0.9700 . ?
C43 H43B 0.9700 . ?
N1 S1 1.649(8) . ?
N1 H1 0.8600 . ?
N2 S2 1.636(7) . ?
N2 H2A 0.8600 . ?
O1 S1 1.399(6) . ?
O2 S1 1.422(5) . ?
O3 S2 1.452(6) . ?
O4 S2 1.434(6) . ?
 
loop_
 _geom_angle_atom_site_label_1
 _geom_angle_atom_site_label_2
 _geom_angle_atom_site_label_3
 _geom_angle
 _geom_angle_site_symmetry_1
 _geom_angle_site_symmetry_3
 _geom_angle_publ_flag
C7 C1 C2 119.5(11) . . ?
C7 C1 S1 121.6(8) . . ?
C2 C1 S1 118.8(8) . . ?
C3 C2 C1 120.0(11) . . ?
C3 C2 H2 120.0 . . ?
C1 C2 H2 120.0 . . ?
C2 C3 C4 119.5(12) . . ?
C2 C3 H3 120.2 . . ?
C4 C3 H3 120.2 . . ?
C6 C4 C3 118.7(13) . . ?
C6 C4 C5 125.4(13) . . ?
C3 C4 C5 115.7(13) . . ?
C4 C5 H5A 109.5 . . ?
C4 C5 H5B 109.5 . . ?
H5A C5 H5B 109.5 . . ?
C4 C5 H5C 109.5 . . ?
H5A C5 H5C 109.5 . . ?
H5B C5 H5C 109.5 . . ?
C4 C6 C7 121.4(11) . . ?
C4 C6 H6 119.3 . . ?
C7 C6 H6 119.3 . . ?
C1 C7 C6 120.8(10) . . ?
C1 C7 H7 119.6 . . ?
C6 C7 H7 119.6 . . ?
N1 C8 C15 109.0(9) . . ?
N1 C8 C9 116.3(9) . . ?
C15 C8 C9 115.7(7) . . ?
N1 C8 H8 104.8 . . ?
C15 C8 H8 104.8 . . ?
C9 C8 H8 104.8 . . ?
C10 C9 C14 118.5(10) . . ?
C10 C9 C8 121.9(10) . . ?
C14 C9 C8 119.6(9) . . ?
C9 C10 C11 118.5(11) . . ?
C9 C10 H10 120.8 . . ?
C11 C10 H10 120.8 . . ?
C12 C11 C10 123.9(12) . . ?
C12 C11 H11 118.0 . . ?
C10 C11 H11 118.0 . . ?
C11 C12 C13 116.0(13) . . ?
C11 C12 H12 122.0 . . ?
C13 C12 H12 122.0 . . ?
C12 C13 C14 123.7(13) . . ?
C12 C13 H13 118.2 . . ?
C14 C13 H13 118.2 . . ?
C13 C14 C9 119.4(12) . . ?
C13 C14 H14 120.3 . . ?
C9 C14 H14 120.3 . . ?
C21 C15 C16 117.2(11) . . ?
C21 C15 C8 122.3(9) . . ?
C16 C15 C8 120.5(10) . . ?
C17 C16 C15 119.5(12) . . ?
C17 C16 H16 120.3 . . ?
C15 C16 H16 120.3 . . ?
C18 C17 C16 119.6(12) . . ?
C18 C17 H17 120.2 . . ?
C16 C17 H17 120.2 . . ?
C20 C18 C17 120.0(11) . . ?
C20 C18 C19 122.0(13) . . ?
C17 C18 C19 117.8(12) . . ?
C18 C19 H19A 109.5 . . ?
C18 C19 H19B 109.5 . . ?
H19A C19 H19B 109.5 . . ?
C18 C19 H19C 109.5 . . ?
H19A C19 H19C 109.5 . . ?
H19B C19 H19C 109.5 . . ?
C21 C20 C18 120.7(11) . . ?
C21 C20 H20 119.6 . . ?
C18 C20 H20 119.6 . . ?
C20 C21 C15 122.8(11) . . ?
C20 C21 H21 118.6 . . ?
C15 C21 H21 118.6 . . ?
C28 C22 C23 120.5(11) . . ?
C28 C22 S2 120.0(8) . . ?
C23 C22 S2 119.5(8) . . ?
C22 C23 C24 115.5(11) . . ?
C22 C23 H23 122.2 . . ?
C24 C23 H23 122.2 . . ?
C25 C24 C23 123.3(11) . . ?
C25 C24 H24 118.4 . . ?
C23 C24 H24 118.4 . . ?
C27 C25 C24 117.7(12) . . ?
C27 C25 C26 120.8(12) . . ?
C24 C25 C26 121.5(12) . . ?
C25 C26 H26A 109.5 . . ?
C25 C26 H26B 109.5 . . ?
H26A C26 H26B 109.5 . . ?
C25 C26 H26C 109.5 . . ?
H26A C26 H26C 109.5 . . ?
H26B C26 H26C 109.5 . . ?
C25 C27 C28 121.3(12) . . ?
C25 C27 H27 119.4 . . ?
C28 C27 H27 119.4 . . ?
C27 C28 C22 121.7(11) . . ?
C27 C28 H28 119.2 . . ?
C22 C28 H28 119.2 . . ?
N2 C29 C30 111.1(7) . . ?
N2 C29 C36 110.4(8) . . ?
C30 C29 C36 111.5(8) . . ?
N2 C29 H29 107.9 . . ?
C30 C29 H29 107.9 . . ?
C36 C29 H29 107.9 . . ?
C35 C30 C31 119.7(11) . . ?
C35 C30 C29 120.7(10) . . ?
C31 C30 C29 119.5(10) . . ?
C32 C31 C30 121.0(13) . . ?
C32 C31 H31 119.5 . . ?
C30 C31 H31 119.5 . . ?
C33 C32 C31 117.4(14) . . ?
C33 C32 H32 121.3 . . ?
C31 C32 H32 121.3 . . ?
C32 C33 C34 124.8(13) . . ?
C32 C33 H33 117.6 . . ?
C34 C33 H33 117.6 . . ?
C33 C34 C35 118.6(13) . . ?
C33 C34 H34 120.7 . . ?
C35 C34 H34 120.7 . . ?
C30 C35 C34 118.4(12) . . ?
C30 C35 H35 120.8 . . ?
C34 C35 H35 120.8 . . ?
C42 C36 C37 116.9(11) . . ?
C42 C36 C29 119.5(10) . . ?
C37 C36 C29 123.4(8) . . ?
C36 C37 C38 120.4(11) . . ?
C36 C37 H37 119.8 . . ?
C38 C37 H37 119.8 . . ?
C39 C38 C37 121.7(13) . . ?
C39 C38 H38 119.1 . . ?
C37 C38 H38 119.1 . . ?
C38 C39 C41 116.9(12) . . ?
C38 C39 C40 122.0(14) . . ?
C41 C39 C40 121.2(12) . . ?
C39 C40 H40A 109.5 . . ?
C39 C40 H40B 109.5 . . ?
H40A C40 H40B 109.5 . . ?
C39 C40 H40C 109.5 . . ?
H40A C40 H40C 109.5 . . ?
H40B C40 H40C 109.5 . . ?
C39 C41 C42 122.6(12) . . ?
C39 C41 H41 118.7 . . ?
C42 C41 H41 118.7 . . ?
C36 C42 C41 121.5(12) . . ?
C36 C42 H42 119.2 . . ?
C41 C42 H42 119.2 . . ?
Cl1 C43 Cl2 120.1(4) . . ?
Cl1 C43 H43A 107.3 . . ?
Cl2 C43 H43A 107.3 . . ?
Cl1 C43 H43B 107.3 . . ?
Cl2 C43 H43B 107.3 . . ?
H43A C43 H43B 106.9 . . ?
C8 N1 S1 125.5(7) . . ?
C8 N1 H1 117.3 . . ?
S1 N1 H1 117.2 . . ?
C29 N2 S2 117.2(6) . . ?
C29 N2 H2A 121.4 . . ?
S2 N2 H2A 121.4 . . ?
O1 S1 O2 119.6(4) . . ?
O1 S1 N1 109.1(5) . . ?
O2 S1 N1 104.2(4) . . ?
O1 S1 C1 108.0(5) . . ?
O2 S1 C1 109.0(5) . . ?
N1 S1 C1 106.2(4) . . ?
O4 S2 O3 118.9(4) . . ?
O4 S2 N2 104.9(4) . . ?
O3 S2 N2 109.4(4) . . ?
O4 S2 C22 108.9(5) . . ?
O3 S2 C22 107.5(4) . . ?
N2 S2 C22 106.7(4) . . ?
 
_diffrn_measured_fraction_theta_max    0.992
_diffrn_reflns_theta_full              25.13
_diffrn_measured_fraction_theta_full   0.992
_refine_diff_density_max    0.956
_refine_diff_density_min   -0.535
_refine_diff_density_rms    0.154
